# Supplementary material for: The evolution of strand preference in simulated RNA replicators with strand displacement: Implications for the origin of transcription
Source: PubMed Central journal article supplement (PMC2648946; doi:10.1186/1745-6150-3-33), 2008-08-11
Supplement: 1745-6150-3-33-S1.pdf [file 1745-6150-3-33-S1.pdf]

## Additional file 1

(The evolution of strand preference in simulated RNA replicators with strand displacement: implications for the origin of transcription)

N. Takeuchi, L. Salazar, A.M. Poole and P. Hogeweg

### 1 Figure 11

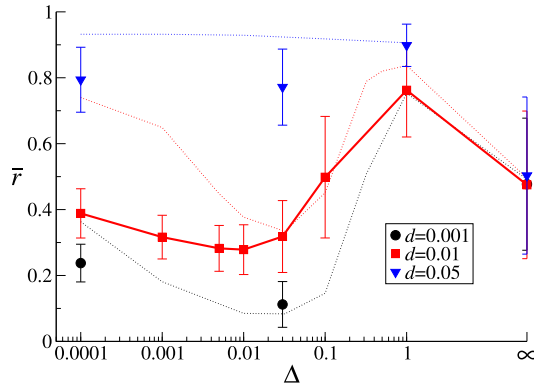

Figure 11: The effect of a smaller decay rate of D.

This figure shows a similar plot to that of Fig. 3 (the coordinate is the population mean of  $r$ ; the abscissa is the intensity of diffusion; error bars are the mean absolute deviation of  $r$  in a population). The plots with error bars represent the results of simulations where the decay rate of D is set to  $0.1d$ , where  $d$  is the decay rate of S and M. The value of  $d$  is shown in the graph. The other parameters are identical to those in Fig. 3:  $k_{SP} = k_{SM} = k_{DP} + k_{DM} = 1$ ;  $\mu = 0.01$ ;  $\delta_r = 0.1$ . For the sake of comparison, the data from Fig. 3 are also shown by the dotted lines (the colors correspond to the values of  $d$ ).

As seen from this figure,  $\bar{r}$  still displays a non-monotonic behavior as a function of  $\Delta$  with the reduced decay rate for D. Moreover, the sharp increase of  $\bar{r}$  between  $\Delta = 0.032$  and 1 is also compatible with our explanation that the decrease of the advantage of producing M is invariant with respect to the decay rate. For more explanation regarding this figure, see Authors' response to Reviewer's report 3.

## 2 Figure 12

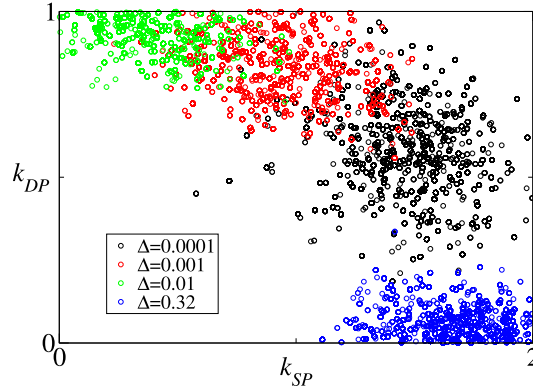

Figure 12: Non-linearity in the anti-correlation between  $k_{SP}$  and  $k_{DP}$ .

The graph shows a scattered plot of  $k_{SP}$  and  $k_{DP}$  of every individual in a system at a given time step after the system reached equilibrium, for various values of  $\Delta$ . The data were obtained from simulations where  $k_{SP}$  and  $k_{SM}$  were allowed to evolve ( $k_{SP} + k_{SM}$  was kept constant; no correlation was presumed between  $k_{SP}$  and  $k_{DP}$ ). The value of  $\Delta$  is shown in the graph. The other parameters are as follows:  $0.5(k_{SP} + k_{SM}) = k_{DP} + k_{DM} = 1$ ;  $d = 0.001$ ;  $\mu = 0.01$ ;  $\delta_r = 0.1$ . The mutation of  $k_{SM}$  and  $k_{SP}$  was implemented in the same way as that of  $k_{DM}$  and  $k_{DP}$ .

This figure shows that the relationship that evolves between  $k_{SP}$  and  $k_{DP}$  is non-linear—namely,  $k_{DP}$  as a function of  $k_{SP}$  is convex. An explanation for this non-linearity can be given as follows. Single-stranded (+) molecules have an replication disadvantage relative to single-stranded (−) molecules (as shown in Fig. 4 in main text). This disadvantage can be compensated by increasing  $k_{SP}$  (at the cost of decreasing  $k_{SM}$ ). This generates a selective force that can cause the non-linearity in question.

### 3 The ODE model with complex formation

The following is the ODE model with complex formation for a system of two replicator species explained under Methods in main text:

$$\begin{aligned}
\dot{P}_1 &= \kappa\theta(2C_{M;1,1} + C_{M;1,2} + C_{M;2,1} + C_{P;1,1} + C_{P;2,1}) + b(C_{M;1,1} + C_{M;2,1} + C_{P;1,1} + C_{P;2,1}) \\
&\quad - P_1(k_{SP1}(P_1 + P_2) + D_1(k_{DM1} + k_{DP1}) + D_2(k_{DM2} + k_{DP2})) - dP_1 \\
\dot{P}_2 &= \kappa\theta(2C_{M;2,2} + C_{M;2,1} + C_{M;1,2} + C_{P;1,2} + C_{P;2,2}) + b(C_{M;2,2} + C_{M;1,2} + C_{P;2,2} + C_{P;1,2}) \\
&\quad - P_2(k_{SP2}(P_1 + P_2) + D_1(k_{DM1} + k_{DP1}) + D_2(k_{DM2} + k_{DP2})) - dP_2 \\
\dot{M}_1 &= \kappa\theta(C_{P;1,1} + C_{P;1,2}) - M_1k_{SM1}(P_1 + P_2) - dM_1 \\
\dot{M}_2 &= \kappa\theta(C_{P;2,2} + C_{P;2,1}) - M_2k_{SM2}(P_1 + P_2) - dM_2 \\
\dot{D}_1 &= P_1k_{SP1}(P_1 + P_2) + M_1k_{SM1}(P_1 + P_2) - D_1(P_1 + P_2)(k_{DM1} + k_{DP1}) \\
&\quad + \kappa\theta(C_{P;1,1} + C_{P;1,2} + C_{M;1,1} + C_{M;1,2}) + b(C_{M;1,1} + C_{M;1,2} + C_{P;1,1} + C_{P;1,2}) - dD_1 \\
\dot{D}_2 &= P_2k_{SP2}(P_1 + P_2) + M_2k_{SM2}(P_1 + P_2) - D_2(P_1 + P_2)(k_{DM2} + k_{DP2}) \\
&\quad + \kappa\theta(C_{P;2,1} + C_{P;2,2} + C_{M;2,1} + C_{M;2,2}) + b(C_{M;2,2} + C_{M;2,1} + C_{P;2,2} + C_{P;2,1}) - dD_2 \\
\dot{C}_{P;1,1} &= k_{DP1}D_1P_1 - C_{P;1,1}(\kappa\theta + b) - dC_{P;1,1} \\
\dot{C}_{P;1,2} &= k_{DP1}D_1P_2 - C_{P;1,2}(\kappa\theta + b) - dC_{P;1,2} \\
\dot{C}_{P;2,1} &= k_{DP2}D_2P_1 - C_{P;2,1}(\kappa\theta + b) - dC_{P;2,1} \\
\dot{C}_{P;2,2} &= k_{DP2}D_2P_2 - C_{P;2,2}(\kappa\theta + b) - dC_{P;2,2} \\
\dot{C}_{M;1,1} &= k_{DM1}D_1P_1 - C_{M;1,1}(\kappa\theta + b) - dC_{M;1,1} \\
\dot{C}_{M;1,2} &= k_{DM1}D_1P_2 - C_{M;1,2}(\kappa\theta + b) - dC_{M;1,2} \\
\dot{C}_{M;2,1} &= k_{DM2}D_2P_1 - C_{M;2,1}(\kappa\theta + b) - dC_{M;2,1} \\
\dot{C}_{M;2,2} &= k_{DM2}D_2P_2 - C_{M;2,2}(\kappa\theta + b) - dC_{M;2,2} \\
\theta &= 1 - \sum_{i=1}^2 [P_i + M_i + D_i + 2 \sum_{j=1}^2 (C_{P;i,j} + C_{M;i,j})].
\end{aligned}$$

The subscript  $i$  in  $P_i$ ,  $M_i$ ,  $D_i$  and  $k_{XYi}$  (where  $X = S$  or  $D$ ;  $Y = P$  or  $M$ ) denotes the species. For  $C_{P;i,j}$  and  $C_{M;i,j}$ , the subscript P and M denotes the template strand; the subscript  $i$  denotes the species of the template ( $D_i$ ); and the subscript  $j$  denotes the species of the replicase ( $P_i$ ). The factor of 2 appears in front of  $C_{P;i,j}$  and  $C_{M;i,j}$  in  $\theta$  in order to take account of the fact that in the CA model one complex molecule occupies two squares. However, whether or not this factor is taken into account does not qualitatively affect the behavior of the ODE model.
